# Supplementary material for: Calculating nuclear magnetic resonance shieldings using systematic molecular fragmentation by annihilation
Source: Royal Society of Chemistry journal article supplement (doi:10.1039/c4cp05116e), 2015-01-01
Supplement: c4cp05116e1.pdf [file c4cp05116e1.pdf]

# Supporting information for: Calculating Nuclear Magnetic Resonance Shieldings Using Systematic Fragmentation by Annihilation

David M. Reid\* and Michael A. Collins\*

*Research School of Chemistry, The Australian National University, ACT, Australia*

E-mail: dreid@rsc.anu.edu.au; collins@rsc.anu.edu.au

## 1 Coordinates of Molecules

The cartesian coordinates for all molecules in this section are reported in Angstrom. The structures of 12 of these molecules were obtained from the Cambridge Structural Database ([www.ccdc.cam.ac.uk](http://www.ccdc.cam.ac.uk)), and are referred to by the appellations given therein. The remaining 3 molecules—GelA, GelB and glycine—were obtained from Ref. 1.

Table S1: Cartesian coordinates of BAVCAC

| Atom Label | x        | y         | z         |
|------------|----------|-----------|-----------|
| C          | 2.314300 | 8.878100  | 0.576100  |
| O          | 2.000300 | 9.761500  | -0.506700 |
| C          | 2.672900 | 9.659400  | 1.834900  |
| O          | 3.839000 | 10.446400 | 1.484800  |
| C          | 3.057800 | 8.710300  | 2.984000  |
| O          | 3.539000 | 9.559600  | 4.037200  |
| C          | 1.930300 | 7.851800  | 3.496500  |
| O          | 0.926400 | 8.639900  | 4.131000  |

Continued on next page

\*To whom correspondence should be addressed

Table S1 – continued from previous page

| <b>Atom Label</b> | <b>x</b> | <b>y</b>  | <b>z</b>  |
|-------------------|----------|-----------|-----------|
| C                 | 2.467700 | 6.780200  | 4.445700  |
| O                 | 3.505100 | 6.017000  | 3.827100  |
| C                 | 1.375100 | 5.882100  | 4.996500  |
| O                 | 1.952800 | 5.127900  | 6.028700  |
| C                 | 1.046800 | 4.238900  | 6.663900  |
| C                 | 1.647100 | 3.897600  | 8.004400  |
| O                 | 1.987200 | 5.112100  | 8.690800  |
| C                 | 2.855800 | 2.977900  | 7.878800  |
| O                 | 3.326000 | 2.541400  | 9.141200  |
| C                 | 2.519400 | 1.783800  | 6.985900  |
| O                 | 3.683500 | 0.966200  | 6.763500  |
| C                 | 2.032500 | 2.289500  | 5.646100  |
| O                 | 0.827100 | 3.076500  | 5.873500  |
| C                 | 1.633900 | 1.185000  | 4.709200  |
| O                 | 1.349700 | 1.673800  | 3.394800  |
| H                 | 1.492700 | 8.185700  | 0.712200  |
| H                 | 2.887100 | 7.960700  | 0.519000  |
| H                 | 1.831000 | 10.174600 | 2.280600  |
| H                 | 3.884700 | 8.107500  | 2.629300  |
| H                 | 1.449800 | 7.234700  | 2.747400  |
| H                 | 2.827900 | 7.280600  | 5.336100  |
| H                 | 1.260300 | 5.475600  | 3.999200  |
| H                 | 0.582900 | 6.329500  | 5.583900  |
| H                 | 0.115400 | 4.688700  | 6.984700  |
| H                 | 0.979900 | 3.417000  | 8.709200  |
| H                 | 3.567500 | 3.500800  | 7.251900  |
| H                 | 1.836700 | 1.269500  | 7.650900  |
| H                 | 2.835800 | 2.929900  | 5.303200  |
| H                 | 0.892900 | 0.727800  | 5.353100  |
| H                 | 2.568500 | 0.685000  | 4.486900  |
| H                 | 2.736200 | 10.120000 | -1.051000 |
| H                 | 4.236500 | 11.211000 | 1.957700  |
| H                 | 4.152000 | 8.913500  | 4.453200  |
| H                 | 0.873200 | 8.847900  | 5.090300  |
| H                 | 3.480800 | 6.062900  | 2.845500  |
| H                 | 1.671300 | 5.335000  | 9.594600  |
| H                 | 2.702100 | 2.415200  | 9.890300  |
| H                 | 3.668500 | 0.420200  | 7.580800  |

Continued on next page

Table S1 – continued from previous page

| <b>Atom Label</b> | <b>x</b> | <b>y</b> | <b>z</b> |
|-------------------|----------|----------|----------|
| H                 | 1.017600 | 2.574200 | 3.182100 |

Table S2: Cartesian coordinates of BDGPGL

| <b>Atom Label</b> | <b>x</b>  | <b>y</b>  | <b>z</b>  |
|-------------------|-----------|-----------|-----------|
| C                 | 1.194700  | 0.270700  | 22.537200 |
| C                 | 2.516400  | -0.327400 | 22.986800 |
| C                 | 2.396400  | -0.720500 | 24.463800 |
| C                 | 2.098700  | 0.572600  | 25.229500 |
| C                 | 0.742100  | 1.073800  | 24.754700 |
| C                 | 0.231200  | 2.323900  | 25.421600 |
| O                 | 1.397800  | 0.736400  | 21.236000 |
| O                 | 2.849700  | -1.456300 | 22.211200 |
| O                 | 3.627900  | -1.313500 | 24.870100 |
| O                 | 1.996000  | 0.355000  | 26.639800 |
| O                 | 0.850100  | 1.385900  | 23.350100 |
| O                 | 1.133700  | 3.428000  | 25.272500 |
| C                 | -0.550500 | 3.838900  | 22.070200 |
| C                 | 0.678900  | 3.602200  | 21.250900 |
| C                 | 0.457300  | 2.648200  | 20.065800 |
| C                 | 0.221000  | 1.209700  | 20.559400 |
| C                 | -0.185500 | 0.217700  | 19.458500 |
| C                 | 0.933800  | -0.203300 | 18.539000 |
| O                 | -0.169600 | 4.663300  | 23.178200 |
| O                 | 1.070600  | 4.858000  | 20.644300 |
| O                 | 1.584000  | 2.664100  | 19.213100 |
| O                 | -0.787700 | -0.941600 | 20.068300 |
| O                 | 0.385700  | -1.064500 | 17.543200 |
| H                 | 0.423600  | -0.483600 | 22.633700 |
| H                 | 3.303100  | 0.416200  | 22.954300 |
| H                 | 1.601300  | -1.445700 | 24.585100 |
| H                 | 2.864200  | 1.310400  | 25.023400 |
| H                 | 0.004500  | 0.310200  | 24.968600 |
| H                 | 0.228600  | 2.148300  | 26.490300 |
| H                 | -0.732300 | 2.696700  | 25.096800 |
| H                 | 3.395500  | -1.079800 | 21.485500 |
| H                 | 3.499700  | -2.032900 | 25.527700 |
| H                 | 2.852300  | 0.013400  | 26.980900 |
| H                 | 0.845600  | 3.932000  | 24.479200 |

Continued on next page

Table S2 – continued from previous page

| <b>Atom Label</b> | <b>x</b>  | <b>y</b>  | <b>z</b>  |
|-------------------|-----------|-----------|-----------|
| H                 | -1.301200 | 4.254300  | 21.409300 |
| H                 | -0.913100 | 2.942300  | 22.557500 |
| H                 | 1.456800  | 3.231900  | 21.907000 |
| H                 | -0.458100 | 2.893500  | 19.541600 |
| H                 | -0.647200 | 1.186700  | 21.206300 |
| H                 | -1.029600 | 0.640800  | 18.928100 |
| H                 | 1.724600  | -0.679400 | 19.105400 |
| H                 | 1.358500  | 0.696000  | 18.110300 |
| H                 | -0.932600 | 5.183400  | 23.515300 |
| H                 | 1.687900  | 5.326500  | 21.249100 |
| H                 | 2.051300  | 3.528900  | 19.204300 |
| H                 | -0.053400 | -1.567700 | 20.255300 |
| H                 | 1.093100  | -1.707700 | 17.314700 |

Table S3: Cartesian coordinates of BIHYAS10

| <b>Atom Label</b> | <b>x</b> | <b>y</b>  | <b>z</b>  |
|-------------------|----------|-----------|-----------|
| O                 | 1.474800 | 0.138500  | 8.619800  |
| C                 | 2.548600 | 0.393900  | 7.663700  |
| C                 | 3.761600 | -0.466900 | 8.041600  |
| O                 | 3.624000 | -1.654100 | 8.314600  |
| C                 | 1.998700 | -0.039700 | 6.305400  |
| C                 | 2.991900 | 0.232900  | 5.215200  |
| C                 | 3.680900 | -0.704200 | 4.604700  |
| N                 | 4.966700 | 0.141700  | 8.035200  |
| C                 | 6.178500 | -0.617200 | 8.335600  |
| C                 | 6.407100 | -0.834000 | 9.839300  |
| O                 | 7.327100 | -1.546800 | 10.235000 |
| C                 | 7.278400 | 0.283400  | 7.754100  |
| C                 | 6.746600 | 1.684200  | 8.028700  |
| C                 | 7.467400 | 0.034300  | 6.260200  |
| C                 | 5.246200 | 1.562900  | 7.742800  |
| N                 | 5.610200 | -0.140600 | 10.653300 |
| C                 | 5.720100 | -0.245800 | 12.100400 |
| C                 | 5.044300 | -1.521000 | 12.573600 |
| O                 | 3.983300 | -1.867700 | 12.027700 |
| C                 | 4.972400 | 0.997200  | 12.704500 |
| C                 | 5.598800 | 2.299200  | 12.166600 |
| C                 | 4.933600 | 0.996100  | 14.235600 |

Continued on next page

Table S3 – continued from previous page

| <b>Atom Label</b> | <b>x</b> | <b>y</b>  | <b>z</b>  |
|-------------------|----------|-----------|-----------|
| C                 | 7.087000 | 2.369000  | 12.318500 |
| N                 | 5.583900 | -2.197200 | 13.605700 |
| C                 | 6.884700 | -1.829100 | 14.206500 |
| C                 | 4.803200 | -3.306100 | 14.180700 |
| C                 | 4.131300 | -2.765100 | 15.451800 |
| O                 | 4.818300 | -2.633100 | 16.461200 |
| C                 | 5.627000 | -4.559800 | 14.498900 |
| C                 | 4.677600 | -5.686900 | 14.901000 |
| C                 | 6.477900 | -4.975200 | 13.305300 |
| N                 | 2.823900 | -2.400100 | 15.442100 |
| C                 | 2.285800 | -1.982600 | 16.742200 |
| C                 | 1.872300 | -2.581500 | 14.322800 |
| C                 | 1.168900 | -1.254800 | 13.965900 |
| O                 | 0.315200 | -0.770700 | 14.691100 |
| C                 | 0.848100 | -3.652800 | 14.636100 |
| N                 | 1.501300 | -0.740600 | 12.767500 |
| C                 | 0.873500 | 0.475500  | 12.257100 |
| C                 | 0.544800 | 0.351000  | 10.767900 |
| C                 | 1.749600 | 0.519500  | 9.878000  |
| O                 | 2.818800 | 0.965000  | 10.228500 |
| H                 | 2.756500 | 1.456800  | 7.672600  |
| H                 | 1.867500 | -1.112600 | 6.373500  |
| H                 | 1.049900 | 0.456000  | 6.141200  |
| H                 | 3.136200 | 1.278900  | 4.974200  |
| H                 | 3.569700 | -1.727900 | 4.940100  |
| H                 | 4.351200 | -0.399600 | 3.810400  |
| H                 | 6.195400 | -1.595700 | 7.871800  |
| H                 | 8.184000 | 0.023200  | 8.287900  |
| H                 | 6.976400 | 1.918200  | 9.060800  |
| H                 | 7.325000 | 2.383200  | 7.437400  |
| H                 | 7.846400 | -0.971800 | 6.129700  |
| H                 | 6.536900 | 0.043700  | 5.706100  |
| H                 | 8.073200 | 0.799900  | 5.791300  |
| H                 | 4.673600 | 2.217900  | 8.387800  |
| H                 | 4.968700 | 1.800200  | 6.723300  |
| H                 | 4.753900 | 0.252400  | 10.292200 |
| H                 | 6.778100 | -0.289200 | 12.327800 |
| H                 | 3.954800 | 0.975600  | 12.334700 |

Continued on next page

Table S3 – continued from previous page

| <b>Atom Label</b> | <b>x</b>  | <b>y</b>  | <b>z</b>  |
|-------------------|-----------|-----------|-----------|
| H                 | 5.411200  | 2.387700  | 11.103700 |
| H                 | 5.145600  | 2.989600  | 12.867200 |
| H                 | 5.883900  | 1.177900  | 14.722200 |
| H                 | 4.455500  | 0.088700  | 14.583400 |
| H                 | 3.910400  | 1.197400  | 14.527800 |
| H                 | 7.641200  | 1.637400  | 11.743500 |
| H                 | 7.440900  | 3.338800  | 11.991200 |
| H                 | 7.454700  | 2.190300  | 13.321300 |
| H                 | 6.814000  | -0.817900 | 14.587800 |
| H                 | 6.952100  | -2.453500 | 15.088800 |
| H                 | 7.667900  | -1.789400 | 13.459500 |
| H                 | 4.149600  | -3.583800 | 13.363000 |
| H                 | 6.310700  | -4.377800 | 15.318800 |
| H                 | 5.182600  | -6.644600 | 14.926500 |
| H                 | 4.162200  | -5.374000 | 15.800700 |
| H                 | 3.986100  | -5.907700 | 14.097300 |
| H                 | 7.131200  | -4.160100 | 13.019400 |
| H                 | 7.073800  | -5.829100 | 13.603200 |
| H                 | 5.810100  | -5.323800 | 12.527200 |
| H                 | 1.256100  | -1.729900 | 16.521500 |
| H                 | 2.457000  | -2.764100 | 17.472200 |
| H                 | 2.908500  | -1.243800 | 17.231600 |
| H                 | 2.427100  | -2.954700 | 13.470800 |
| H                 | 0.304900  | -3.369400 | 15.529200 |
| H                 | 1.404300  | -4.572400 | 14.769900 |
| H                 | 0.300900  | -3.851000 | 13.722800 |
| H                 | 2.378600  | -1.102600 | 12.424900 |
| H                 | 1.433500  | 1.375400  | 12.479400 |
| H                 | -0.048000 | 0.579500  | 12.816500 |
| H                 | 0.044100  | 1.296200  | 10.598300 |
| H                 | 0.114000  | -0.620300 | 10.558600 |

Table S4: Cartesian coordinates of DOSLED

| <b>Atom Label</b> | <b>x</b>  | <b>y</b>  | <b>z</b>  |
|-------------------|-----------|-----------|-----------|
| F                 | 10.498100 | -3.859600 | -1.088300 |
| F                 | 11.227300 | -1.861900 | -1.322600 |
| F                 | 9.243600  | -2.194900 | -0.574200 |
| F                 | 7.021400  | -1.081200 | 5.640900  |

Continued on next page

Table S4 – continued from previous page

| <b>Atom Label</b> | <b>x</b>  | <b>y</b>  | <b>z</b>  |
|-------------------|-----------|-----------|-----------|
| F                 | 7.244100  | 0.249300  | 7.313600  |
| F                 | 5.657700  | 0.555000  | 5.897400  |
| O                 | 10.660800 | -0.375100 | 1.046900  |
| O                 | 12.317200 | -1.224100 | 2.302100  |
| O                 | 12.188900 | -3.563300 | 0.914300  |
| O                 | 8.566100  | 1.631400  | 3.021900  |
| O                 | 6.722000  | 0.362500  | 3.227100  |
| O                 | 9.223600  | 0.837900  | 5.558700  |
| N                 | 9.039700  | 3.108100  | -0.865900 |
| H                 | 9.263800  | 3.951200  | -0.358800 |
| C                 | 9.933100  | 1.912000  | 1.108700  |
| H                 | 10.180100 | 2.880700  | 1.525400  |
| C                 | 8.516600  | 1.575000  | 1.559500  |
| H                 | 8.253000  | 0.576000  | 1.234900  |
| C                 | 7.511300  | 2.574500  | 1.028200  |
| H                 | 7.662200  | 3.528300  | 1.518400  |
| H                 | 6.510300  | 2.234000  | 1.262800  |
| C                 | 7.638100  | 2.759800  | -0.484600 |
| H                 | 7.344900  | 1.845900  | -0.986100 |
| H                 | 6.970300  | 3.548900  | -0.807400 |
| C                 | 9.979900  | 2.048400  | -0.399800 |
| H                 | 10.987500 | 2.298400  | -0.708400 |
| H                 | 9.713400  | 1.103300  | -0.856600 |
| C                 | 10.977100 | 0.940400  | 1.588600  |
| H                 | 11.958300 | 1.253800  | 1.254200  |
| H                 | 10.980700 | 0.905400  | 2.671000  |
| C                 | 11.438600 | -1.366200 | 1.492100  |
| C                 | 11.061300 | -2.739800 | 0.916400  |
| C                 | 10.496800 | -2.652700 | -0.525600 |
| C                 | 13.322200 | -3.129900 | 0.160000  |
| H                 | 13.236700 | -3.489700 | -0.858000 |
| H                 | 14.226300 | -3.523800 | 0.607600  |
| H                 | 13.362500 | -2.047700 | 0.159300  |
| C                 | 10.020900 | -3.395500 | 1.835200  |
| C                 | 8.885900  | -2.710000 | 2.256300  |
| H                 | 8.728500  | -1.687400 | 1.936200  |
| C                 | 7.962800  | -3.319400 | 3.075200  |
| H                 | 7.088300  | -2.771400 | 3.403500  |

Continued on next page

Table S4 – continued from previous page

| <b>Atom Label</b> | <b>x</b>  | <b>y</b>  | <b>z</b>  |
|-------------------|-----------|-----------|-----------|
| C                 | 8.147200  | -4.625500 | 3.479000  |
| H                 | 7.413700  | -5.108600 | 4.112600  |
| C                 | 9.270100  | -5.310300 | 3.071800  |
| H                 | 9.420000  | -6.332500 | 3.396600  |
| C                 | 10.209700 | -4.706100 | 2.250100  |
| H                 | 11.088000 | -5.254300 | 1.932400  |
| C                 | 7.630500  | 0.968700  | 3.708700  |
| C                 | 7.885600  | 1.139000  | 5.223100  |
| C                 | 6.930500  | 0.211900  | 6.012500  |
| C                 | 9.760300  | -0.415800 | 5.114500  |
| H                 | 9.354800  | -1.217300 | 5.719500  |
| H                 | 10.838800 | -0.399900 | 5.211700  |
| H                 | 9.493000  | -0.575900 | 4.077300  |
| C                 | 7.617300  | 2.587700  | 5.621600  |
| C                 | 6.482200  | 3.242400  | 5.137700  |
| H                 | 5.803700  | 2.725500  | 4.470400  |
| C                 | 6.225000  | 4.545800  | 5.508400  |
| H                 | 5.344000  | 5.048100  | 5.128200  |
| C                 | 7.077300  | 5.210000  | 6.355100  |
| H                 | 6.866000  | 6.230700  | 6.649000  |
| C                 | 8.203500  | 4.572600  | 6.831400  |
| H                 | 8.879300  | 5.097500  | 7.495300  |
| C                 | 8.475100  | 3.268900  | 6.468800  |
| H                 | 9.362300  | 2.777300  | 6.848700  |
| C                 | 9.187300  | 3.283100  | -2.342900 |
| H                 | 8.729400  | 2.435800  | -2.838300 |
| H                 | 10.242300 | 3.274500  | -2.587300 |
| C                 | 8.577800  | 4.547100  | -2.890600 |
| C                 | 9.265700  | 5.746000  | -2.802600 |
| H                 | 10.198800 | 5.785500  | -2.254300 |
| C                 | 8.784300  | 6.894300  | -3.403200 |
| H                 | 9.341200  | 7.821000  | -3.340100 |
| C                 | 7.580800  | 6.846600  | -4.087200 |
| H                 | 7.200400  | 7.734600  | -4.576700 |
| C                 | 6.868700  | 5.672100  | -4.144100 |
| H                 | 5.917100  | 5.643900  | -4.660500 |
| C                 | 7.361100  | 4.524300  | -3.545500 |
| H                 | 6.790600  | 3.604900  | -3.591500 |

Continued on next page



Table S4 – continued from previous page

| <b>Atom Label</b> | <b>x</b>  | <b>y</b>  | <b>z</b>  |
|-------------------|-----------|-----------|-----------|
| F                 | 7.086500  | 6.868200  | 3.006600  |
| F                 | 8.309100  | 8.573100  | 3.451200  |
| F                 | 7.316100  | 8.419700  | 1.552500  |
| O                 | 9.826700  | 5.161900  | 0.556100  |
| O                 | 7.709200  | 5.871400  | 0.433400  |
| O                 | 9.995600  | 6.533200  | 2.987400  |
| C                 | 8.860500  | 5.921400  | 0.876900  |
| C                 | 9.233700  | 7.026900  | 1.897700  |
| C                 | 7.976100  | 7.720500  | 2.470600  |
| C                 | 9.518500  | 5.356000  | 3.634100  |
| H                 | 8.462500  | 5.463900  | 3.848600  |
| H                 | 10.061300 | 5.207700  | 4.559400  |
| H                 | 9.670000  | 4.501400  | 2.986300  |
| C                 | 10.086700 | 8.083800  | 1.211100  |
| C                 | 9.792400  | 8.472400  | -0.093500 |
| H                 | 8.964400  | 8.015400  | -0.621200 |
| C                 | 10.564100 | 9.448600  | -0.718200 |
| H                 | 10.328800 | 9.754300  | -1.730200 |
| C                 | 11.628500 | 10.030000 | -0.054400 |
| H                 | 12.226600 | 10.789600 | -0.542300 |
| C                 | 11.922200 | 9.634600  | 1.229600  |
| H                 | 12.761200 | 10.079100 | 1.750400  |
| C                 | 11.153700 | 8.675600  | 1.860500  |
| H                 | 11.390400 | 8.383200  | 2.876000  |

Table S5: Cartesian coordinates of GENTBS01

| <b>Atom Label</b> | <b>x</b> | <b>y</b> | <b>z</b>  |
|-------------------|----------|----------|-----------|
| C                 | 3.212300 | 5.965500 | 1.411200  |
| C                 | 3.889700 | 4.975600 | 2.345900  |
| C                 | 4.896300 | 4.143400 | 1.577300  |
| C                 | 4.280900 | 3.507100 | 0.349000  |
| C                 | 3.525400 | 4.556900 | -0.465300 |
| C                 | 2.789000 | 3.939800 | -1.630400 |
| O                 | 2.226000 | 6.665800 | 2.101600  |
| O                 | 4.521800 | 5.708500 | 3.385100  |
| O                 | 5.417100 | 3.139000 | 2.456700  |
| O                 | 5.330400 | 2.957900 | -0.465500 |
| O                 | 2.575600 | 5.221700 | 0.371500  |

Continued on next page

Table S5 – continued from previous page

| <b>Atom Label</b> | <b>x</b>  | <b>y</b>  | <b>z</b>  |
|-------------------|-----------|-----------|-----------|
| O                 | 1.858600  | 2.980300  | -1.136300 |
| C                 | 1.518100  | 2.011600  | -2.072800 |
| C                 | 0.463400  | 1.106900  | -1.469100 |
| C                 | -0.064400 | 0.138400  | -2.523600 |
| C                 | -0.497700 | 0.862400  | -3.788900 |
| C                 | 0.584500  | 1.836800  | -4.267900 |
| C                 | 0.101600  | 2.768500  | -5.359200 |
| O                 | 1.036900  | 0.382900  | -0.381300 |
| O                 | -1.173100 | -0.569100 | -1.982500 |
| O                 | -0.736000 | -0.110100 | -4.813700 |
| O                 | 0.975100  | 2.684900  | -3.192100 |
| O                 | -0.902500 | 3.668400  | -4.895500 |
| H                 | 3.847600  | 6.763500  | 1.047100  |
| H                 | 3.106000  | 4.347100  | 2.750300  |
| H                 | 5.745100  | 4.763200  | 1.316100  |
| H                 | 3.565500  | 2.741000  | 0.621300  |
| H                 | 4.221300  | 5.322200  | -0.785900 |
| H                 | 2.193000  | 4.675700  | -2.156000 |
| H                 | 3.585100  | 3.528700  | -2.238700 |
| H                 | 1.716400  | 7.229800  | 1.478400  |
| H                 | 5.191600  | 5.081200  | 3.737600  |
| H                 | 6.383900  | 3.310200  | 2.504800  |
| H                 | 5.170100  | 2.002300  | -0.631200 |
| H                 | 2.400500  | 1.439900  | -2.332500 |
| H                 | -0.384500 | 1.705700  | -1.160200 |
| H                 | 0.722900  | -0.577400 | -2.724900 |
| H                 | -1.419600 | 1.400900  | -3.607200 |
| H                 | 1.448800  | 1.276500  | -4.602500 |
| H                 | -0.350400 | 2.192200  | -6.157000 |
| H                 | 0.933500  | 3.382500  | -5.681300 |
| H                 | -0.875100 | -1.490600 | -1.814300 |
| H                 | -1.657700 | 0.109500  | -5.075500 |
| H                 | -0.524100 | 4.243500  | -4.193800 |
| H                 | 0.309700  | 0.303200  | 0.275300  |

Table S6: Cartesian coordinates of GelA

| Atom Label | x          | y         | z         |
|------------|------------|-----------|-----------|
| C          | -12.220450 | 1.876231  | 0.539352  |
| C          | -11.084357 | 1.345636  | -0.334529 |
| C          | -10.063993 | 0.516894  | 0.448114  |
| C          | -8.924928  | -0.019970 | -0.420532 |
| C          | -7.904194  | -0.848406 | 0.362077  |
| C          | -6.767667  | -1.388022 | -0.508415 |
| C          | -5.743871  | -2.213725 | 0.273133  |
| C          | -4.611209  | -2.757060 | -0.600091 |
| C          | -3.581346  | -3.576197 | 0.180465  |
| C          | -2.453507  | -4.123327 | -0.696578 |
| C          | -1.414399  | -4.931053 | 0.083533  |
| C          | -0.291664  | -5.481390 | -0.797960 |
| C          | 0.761383   | -6.270372 | -0.017385 |
| C          | 1.857505   | -6.851687 | -0.916887 |
| C          | 2.973075   | -7.613151 | -0.174509 |
| C          | 4.240813   | -6.827541 | 0.201708  |
| C          | 4.095725   | -5.710971 | 1.255086  |
| C          | 3.815516   | -4.297436 | 0.722356  |
| C          | 5.015655   | -3.647781 | 0.028573  |
| C          | 4.736380   | -2.232889 | -0.450985 |
| O          | 4.467494   | -1.418297 | 0.667595  |
| P          | 4.137086   | 0.136126  | 0.501256  |
| O          | 4.054035   | 0.756953  | 1.828780  |
| O          | 4.907686   | 0.735648  | -0.609293 |
| O          | 2.564221   | 0.053112  | -0.053576 |
| C          | 2.179286   | 0.622170  | -1.251075 |
| C          | 1.211668   | 1.790254  | -1.066896 |
| N          | 1.704657   | 3.045375  | -0.363738 |
| C          | 0.684404   | 4.115811  | -0.710941 |
| C          | 0.532063   | 5.443957  | 0.073136  |
| C          | 1.750359   | 6.384633  | 0.145102  |
| C          | 2.228311   | 6.927653  | -1.206877 |
| C          | 3.470272   | 7.823806  | -1.119054 |
| C          | 3.262001   | 9.129190  | -0.349183 |
| C          | 1.778826   | 2.814853  | 1.117332  |
| C          | 3.062642   | 3.412288  | -0.878154 |
| C          | -0.163103  | 5.301544  | 1.448005  |

Continued on next page

Table S6 – continued from previous page

| <b>Atom Label</b> | <b>x</b>   | <b>y</b>  | <b>z</b>  |
|-------------------|------------|-----------|-----------|
| C                 | -1.047833  | 6.501183  | 1.797341  |
| H                 | -11.840279 | 2.516368  | 1.330758  |
| H                 | -12.767089 | 1.062650  | 1.007974  |
| H                 | -12.928419 | 2.456999  | -0.044020 |
| H                 | -11.500073 | 0.740030  | -1.137202 |
| H                 | -10.577732 | 2.180659  | -0.814356 |
| H                 | -10.573180 | -0.316457 | 0.929643  |
| H                 | -9.649556  | 1.124315  | 1.251366  |
| H                 | -8.417074  | 0.813998  | -0.902889 |
| H                 | -9.341135  | -0.626920 | -1.222929 |
| H                 | -8.412133  | -1.681027 | 0.845862  |
| H                 | -7.486656  | -0.240774 | 1.163411  |
| H                 | -6.261547  | -0.555348 | -0.995098 |
| H                 | -7.186031  | -1.997373 | -1.307815 |
| H                 | -6.249925  | -3.044404 | 0.762144  |
| H                 | -5.322879  | -1.603400 | 1.070636  |
| H                 | -4.109036  | -1.926457 | -1.094557 |
| H                 | -5.032952  | -3.371607 | -1.393766 |
| H                 | -4.083429  | -4.404260 | 0.678027  |
| H                 | -3.155830  | -2.960242 | 0.971034  |
| H                 | -1.957575  | -3.295426 | -1.201470 |
| H                 | -2.879197  | -4.746339 | -1.481665 |
| H                 | -1.909129  | -5.756492 | 0.592999  |
| H                 | -0.984570  | -4.305254 | 0.863517  |
| H                 | 0.192995   | -4.656042 | -1.317410 |
| H                 | -0.720158  | -6.117559 | -1.571337 |
| H                 | 0.276748   | -7.087433 | 0.515132  |
| H                 | 1.194708   | -5.628976 | 0.743341  |
| H                 | 2.293921   | -6.061656 | -1.524382 |
| H                 | 1.380310   | -7.532803 | -1.618328 |
| H                 | 2.559100   | -8.071352 | 0.722426  |
| H                 | 3.296076   | -8.439226 | -0.803640 |
| H                 | 4.953679   | -7.556739 | 0.579396  |
| H                 | 4.687417   | -6.427890 | -0.705767 |
| H                 | 3.316985   | -5.990055 | 1.961067  |
| H                 | 5.012728   | -5.664645 | 1.838076  |
| H                 | 2.974152   | -4.309198 | 0.034646  |
| H                 | 3.523547   | -3.663017 | 1.551877  |

Continued on next page

Table S6 – continued from previous page

| <b>Atom Label</b> | <b>x</b>  | <b>y</b>  | <b>z</b>  |
|-------------------|-----------|-----------|-----------|
| H                 | 5.861830  | -3.618290 | 0.709892  |
| H                 | 5.324418  | -4.233952 | -0.834500 |
| H                 | 3.880038  | -2.227444 | -1.121377 |
| H                 | 5.585479  | -1.833525 | -0.990318 |
| H                 | 3.033453  | 0.904070  | -1.847200 |
| H                 | 1.603414  | -0.103197 | -1.821829 |
| H                 | 0.885843  | 2.108708  | -2.049283 |
| H                 | 0.347981  | 1.460443  | -0.507202 |
| H                 | 0.866172  | 4.340659  | -1.751998 |
| H                 | -0.273968 | 3.619119  | -0.655176 |
| H                 | -0.193540 | 5.945652  | -0.567291 |
| H                 | 1.460849  | 7.223623  | 0.765899  |
| H                 | 2.572322  | 5.911778  | 0.674379  |
| H                 | 2.452037  | 6.109339  | -1.885281 |
| H                 | 1.415461  | 7.486759  | -1.667507 |
| H                 | 3.787980  | 8.061738  | -2.130506 |
| H                 | 4.287748  | 7.264353  | -0.669429 |
| H                 | 3.054018  | 8.956477  | 0.701632  |
| H                 | 4.150544  | 9.749356  | -0.404068 |
| H                 | 2.435398  | 9.700069  | -0.763664 |
| H                 | 0.789107  | 2.573387  | 1.472573  |
| H                 | 2.465223  | 2.015753  | 1.344970  |
| H                 | 2.126224  | 3.722639  | 1.579729  |
| H                 | 2.996248  | 3.552992  | -1.947796 |
| H                 | 3.377970  | 4.326920  | -0.409523 |
| H                 | 3.770612  | 2.628258  | -0.658401 |
| H                 | -0.788323 | 4.413277  | 1.455079  |
| H                 | 0.571089  | 5.165070  | 2.234198  |
| H                 | -1.507910 | 6.359315  | 2.769355  |
| H                 | -0.486917 | 7.428600  | 1.836748  |
| H                 | -1.844619 | 6.625000  | 1.069694  |

Table S7: Cartesian coordinates of GelB

| <b>Atom Label</b> | <b>x</b>  | <b>y</b> | <b>z</b>  |
|-------------------|-----------|----------|-----------|
| C                 | 13.802796 | 8.768436 | -0.660471 |
| H                 | 12.970821 | 9.420028 | -0.912262 |
| H                 | 14.257725 | 8.439779 | -1.590486 |
| H                 | 14.537037 | 9.362174 | -0.125715 |

Continued on next page

Table S7 – continued from previous page

| <b>Atom Label</b> | <b>x</b>  | <b>y</b>  | <b>z</b>  |
|-------------------|-----------|-----------|-----------|
| C                 | 13.337873 | 7.578111  | 0.177430  |
| H                 | 14.197009 | 6.965331  | 0.441781  |
| H                 | 12.920264 | 7.938129  | 1.115259  |
| C                 | 12.300147 | 6.712124  | -0.539189 |
| H                 | 12.719572 | 6.352732  | -1.477439 |
| H                 | 11.442215 | 7.327514  | -0.805634 |
| C                 | 11.827992 | 5.519336  | 0.293999  |
| H                 | 11.407716 | 5.879319  | 1.231517  |
| H                 | 12.685980 | 4.905005  | 0.561313  |
| C                 | 10.791611 | 4.653480  | -0.424855 |
| H                 | 11.212697 | 4.291263  | -1.361110 |
| H                 | 9.934168  | 5.268015  | -0.694246 |
| C                 | 10.316754 | 3.462483  | 0.409647  |
| H                 | 9.893510  | 3.824057  | 1.345106  |
| H                 | 11.173334 | 2.847963  | 0.680414  |
| C                 | 9.282225  | 2.596123  | -0.311343 |
| H                 | 9.706274  | 2.231074  | -1.245048 |
| H                 | 8.425850  | 3.210382  | -0.584664 |
| C                 | 8.804500  | 1.407530  | 0.525120  |
| H                 | 8.377007  | 1.771053  | 1.457619  |
| H                 | 9.659313  | 0.792881  | 0.800090  |
| C                 | 7.772719  | 0.540733  | -0.199473 |
| H                 | 8.201053  | 0.171980  | -1.129478 |
| H                 | 6.917239  | 1.153971  | -0.477117 |
| C                 | 7.293123  | -0.644543 | 0.641205  |
| H                 | 6.859051  | -0.278677 | 1.568928  |
| H                 | 8.145910  | -1.258736 | 0.920344  |
| C                 | 6.264594  | -1.510899 | -0.090882 |
| H                 | 6.703705  | -1.886661 | -1.013683 |
| H                 | 5.405717  | -0.904950 | -0.369989 |
| C                 | 5.795976  | -2.683031 | 0.762700  |
| H                 | 5.309176  | -2.341080 | 1.664621  |
| H                 | 6.629412  | -3.310884 | 1.052665  |
| N                 | 4.823130  | -3.502359 | 0.015617  |
| C                 | 4.035811  | -4.382573 | 0.603747  |
| H                 | 4.852432  | -3.455918 | -0.979706 |
| O                 | 3.977464  | -4.627520 | 1.781870  |
| C                 | 3.037805  | -5.146958 | -0.295900 |

Continued on next page

Table S7 – continued from previous page

| <b>Atom Label</b> | <b>x</b>   | <b>y</b>  | <b>z</b>  |
|-------------------|------------|-----------|-----------|
| H                 | 3.436883   | -5.379732 | -1.273262 |
| C                 | 1.726468   | -4.355061 | -0.392598 |
| H                 | 1.948528   | -3.387177 | -0.818541 |
| H                 | 1.311084   | -4.205247 | 0.595307  |
| S                 | 0.506171   | -5.232960 | -1.444844 |
| S                 | -1.302654  | -4.840272 | -0.555811 |
| C                 | -1.901773  | -3.373134 | -1.486101 |
| H                 | -1.572716  | -3.452771 | -2.514067 |
| H                 | -1.480507  | -2.469423 | -1.068790 |
| C                 | -3.432348  | -3.243161 | -1.437491 |
| H                 | -3.724235  | -2.410568 | -2.062686 |
| C                 | -3.981735  | -3.116882 | 0.000868  |
| O                 | -4.343660  | -4.141257 | 0.524089  |
| N                 | -3.957385  | -1.912722 | 0.540226  |
| H                 | -3.737918  | -1.128202 | -0.033647 |
| C                 | -4.427854  | -1.639164 | 1.911630  |
| H                 | -4.279333  | -2.545182 | 2.478707  |
| H                 | -3.773831  | -0.877574 | 2.316733  |
| C                 | -5.886950  | -1.193086 | 1.967697  |
| H                 | -6.515487  | -1.983713 | 1.566670  |
| H                 | -6.147779  | -1.097112 | 3.017641  |
| C                 | -6.170424  | 0.129431  | 1.251041  |
| H                 | -5.510713  | 0.901364  | 1.643745  |
| H                 | -5.939364  | 0.035978  | 0.189306  |
| C                 | -7.624437  | 0.584839  | 1.398479  |
| H                 | -8.284515  | -0.192255 | 1.017893  |
| H                 | -7.856718  | 0.691423  | 2.455329  |
| C                 | -7.917835  | 1.901978  | 0.677606  |
| H                 | -7.686626  | 1.792991  | -0.381364 |
| H                 | -7.252618  | 2.675199  | 1.057320  |
| C                 | -9.368903  | 2.361490  | 0.833384  |
| H                 | -10.033809 | 1.586768  | 0.455715  |
| H                 | -9.598075  | 2.470209  | 1.891449  |
| C                 | -9.664157  | 3.678495  | 0.113009  |
| H                 | -9.434717  | 3.568947  | -0.945884 |
| H                 | -8.997542  | 4.451660  | 0.490797  |
| C                 | -11.114300 | 4.139607  | 0.271178  |
| H                 | -11.780580 | 3.365764  | -0.106063 |

Continued on next page

Table S7 – continued from previous page

| <b>Atom Label</b> | <b>x</b>   | <b>y</b>  | <b>z</b>  |
|-------------------|------------|-----------|-----------|
| H                 | -11.342841 | 4.248306  | 1.329705  |
| C                 | -11.410406 | 5.456887  | -0.448255 |
| H                 | -11.181268 | 5.347951  | -1.507154 |
| H                 | -10.743698 | 6.230179  | -0.070555 |
| C                 | -12.860295 | 5.918203  | -0.289994 |
| H                 | -13.527520 | 5.145191  | -0.667812 |
| H                 | -13.089947 | 6.027096  | 0.768524  |
| C                 | -13.157731 | 7.235763  | -1.008218 |
| H                 | -12.492991 | 8.009589  | -0.630151 |
| H                 | -12.929530 | 7.128194  | -2.066602 |
| C                 | -14.607891 | 7.689506  | -0.845934 |
| H                 | -14.786970 | 8.625148  | -1.365619 |
| H                 | -15.297162 | 6.951704  | -1.246586 |
| H                 | -14.857131 | 7.839860  | 0.200482  |
| N                 | 2.812289   | -6.443420 | 0.425252  |
| H                 | 3.566788   | -7.097980 | 0.265418  |
| H                 | 2.817098   | -6.235061 | 1.423555  |
| H                 | 1.947822   | -6.896191 | 0.158824  |
| N                 | -4.099678  | -4.474097 | -1.984441 |
| H                 | -5.023806  | -4.268016 | -2.341186 |
| H                 | -3.578238  | -4.927741 | -2.720858 |
| H                 | -4.226235  | -5.119876 | -1.204153 |

Table S8: Cartesian coordinates of HEBLIJ

| <b>Atom Label</b> | <b>x</b>   | <b>y</b>  | <b>z</b>  |
|-------------------|------------|-----------|-----------|
| N                 | -9.495200  | 12.487000 | 6.736100  |
| C                 | -9.615400  | 12.744800 | 9.224900  |
| O                 | -9.978800  | 13.242100 | 10.255100 |
| C                 | -10.048500 | 13.247100 | 7.850600  |
| C                 | -9.819500  | 14.744200 | 7.703000  |
| C                 | -8.328400  | 15.073000 | 7.716300  |
| C                 | -10.490200 | 15.284500 | 6.453000  |
| O                 | -8.810200  | 11.664100 | 9.181600  |
| C                 | -7.208400  | 10.343900 | 10.458300 |
| O                 | -6.658900  | 10.112500 | 11.550600 |
| C                 | -8.503000  | 11.062700 | 10.509300 |
| C                 | -9.609600  | 10.177000 | 10.912300 |
| N                 | -6.708500  | 9.927500  | 9.294900  |

Continued on next page



Table S8 – continued from previous page

| <b>Atom Label</b> | <b>x</b>   | <b>y</b>  | <b>z</b>  |
|-------------------|------------|-----------|-----------|
| C                 | -4.312100  | 10.066300 | 9.060600  |
| O                 | -4.294000  | 10.871000 | 8.125900  |
| C                 | -5.504600  | 9.114500  | 9.227200  |
| C                 | -5.553200  | 8.124700  | 8.057100  |
| C                 | -4.245300  | 7.392700  | 7.922800  |
| C                 | -6.682800  | 7.120100  | 8.280200  |
| N                 | -3.298000  | 10.008400 | 9.958700  |
| C                 | -2.172300  | 12.239200 | 10.207400 |
| O                 | -1.273600  | 12.787700 | 10.849000 |
| C                 | -2.058700  | 10.776800 | 9.740000  |
| C                 | -1.043700  | 10.026600 | 10.612600 |
| C                 | -1.864100  | 9.570600  | 11.769300 |
| C                 | -3.207300  | 9.131000  | 11.137600 |
| N                 | -3.305600  | 12.853800 | 9.889900  |
| C                 | -4.012500  | 14.997000 | 8.913000  |
| O                 | -4.129900  | 16.185000 | 8.884100  |
| C                 | -3.618500  | 14.228600 | 10.160700 |
| C                 | -4.629800  | 14.430200 | 11.289700 |
| C                 | -5.952000  | 13.838700 | 10.952200 |
| C                 | -4.097400  | 13.894800 | 12.620700 |
| O                 | -4.236700  | 14.208800 | 7.838400  |
| C                 | -5.317600  | 13.906400 | 5.673700  |
| O                 | -5.884300  | 14.359200 | 4.653500  |
| C                 | -4.637400  | 14.883000 | 6.592900  |
| C                 | -3.439200  | 15.504200 | 5.906800  |
| N                 | -5.201200  | 12.601000 | 5.901300  |
| C                 | -7.041500  | 11.115500 | 5.379500  |
| O                 | -7.182700  | 10.490900 | 6.427500  |
| C                 | -5.665800  | 11.598000 | 4.931100  |
| C                 | -4.698400  | 10.414900 | 4.816700  |
| C                 | -5.220300  | 9.402000  | 3.856500  |
| C                 | -3.316100  | 10.909000 | 4.437100  |
| N                 | -8.113800  | 11.393100 | 4.595800  |
| C                 | -10.138200 | 11.558400 | 6.080000  |
| O                 | -11.284900 | 11.234500 | 6.363100  |
| C                 | -9.437900  | 10.831300 | 4.930000  |
| C                 | -10.203000 | 11.006500 | 3.608900  |
| C                 | -9.604900  | 12.257300 | 3.019500  |

Continued on next page

Table S8 – continued from previous page

| <b>Atom Label</b> | <b>x</b>   | <b>y</b>  | <b>z</b>  |
|-------------------|------------|-----------|-----------|
| C                 | -8.154800  | 12.111900 | 3.289200  |
| H                 | -8.528900  | 12.710000 | 6.549900  |
| H                 | -11.127600 | 13.200200 | 7.929900  |
| H                 | -10.245800 | 15.149600 | 8.612200  |
| H                 | -8.173200  | 16.143900 | 7.673200  |
| H                 | -7.758700  | 14.390400 | 8.334700  |
| H                 | -7.737900  | 14.734400 | 6.874000  |
| H                 | -10.455600 | 16.366500 | 6.483200  |
| H                 | -10.021900 | 14.697500 | 5.672600  |
| H                 | -11.443600 | 14.834400 | 6.205300  |
| H                 | -8.436700  | 11.940600 | 11.139900 |
| H                 | -9.342100  | 9.808700  | 11.894900 |
| H                 | -10.535900 | 10.709200 | 10.734100 |
| H                 | -9.707200  | 9.534100  | 10.046200 |
| H                 | -7.197500  | 10.169000 | 8.446000  |
| H                 | -5.421400  | 8.563700  | 10.155900 |
| H                 | -5.842100  | 8.701300  | 7.187000  |
| H                 | -3.475800  | 8.117400  | 7.686900  |
| H                 | -3.883300  | 6.898100  | 8.815600  |
| H                 | -4.330600  | 6.688000  | 7.104900  |
| H                 | -7.593600  | 7.594300  | 8.624200  |
| H                 | -6.843900  | 6.743800  | 7.277600  |
| H                 | -6.558800  | 6.835400  | 9.317800  |
| H                 | -1.782100  | 10.661600 | 8.699300  |
| H                 | -0.557100  | 9.312000  | 9.960300  |
| H                 | -0.196100  | 10.662000 | 10.837900 |
| H                 | -1.986500  | 10.533800 | 12.248900 |
| H                 | -1.468400  | 8.710100  | 12.294600 |
| H                 | -3.168600  | 8.091100  | 10.837600 |
| H                 | -4.050400  | 9.334900  | 11.786100 |
| H                 | -3.963400  | 12.322200 | 9.339600  |
| H                 | -2.687900  | 14.676000 | 10.487200 |
| H                 | -5.035900  | 15.430200 | 11.378300 |
| H                 | -3.097400  | 14.265900 | 12.808000 |
| H                 | -4.811500  | 13.914700 | 13.434700 |
| H                 | -4.187700  | 12.843100 | 12.378600 |
| H                 | -5.765800  | 13.614900 | 9.909100  |
| H                 | -5.577800  | 12.825400 | 10.873300 |

Continued on next page

Table S8 – continued from previous page

| <b>Atom Label</b> | <b>x</b>   | <b>y</b>  | <b>z</b>  |
|-------------------|------------|-----------|-----------|
| H                 | -6.669300  | 14.130200 | 11.709500 |
| H                 | -5.419700  | 15.612000 | 6.764300  |
| H                 | -3.728400  | 15.881100 | 4.933600  |
| H                 | -2.843900  | 16.214900 | 6.466700  |
| H                 | -2.674000  | 14.738800 | 5.868200  |
| H                 | -4.820200  | 12.306500 | 6.788000  |
| H                 | -5.781400  | 12.086700 | 3.971500  |
| H                 | -4.682900  | 10.068600 | 5.842700  |
| H                 | -4.555100  | 8.566600  | 3.676400  |
| H                 | -6.128100  | 8.848600  | 4.062400  |
| H                 | -5.183000  | 10.109000 | 3.036900  |
| H                 | -2.556700  | 10.137600 | 4.471100  |
| H                 | -3.461900  | 11.312200 | 3.442500  |
| H                 | -2.766200  | 11.337100 | 5.266000  |
| H                 | -9.323000  | 9.818400  | 5.295600  |
| H                 | -9.925300  | 10.137600 | 3.025200  |
| H                 | -11.270700 | 11.060400 | 3.782500  |
| H                 | -9.719100  | 12.390600 | 1.950800  |
| H                 | -9.970700  | 13.205800 | 3.392800  |
| H                 | -7.635700  | 13.055100 | 3.406500  |
| H                 | -7.781700  | 11.462300 | 2.507100  |

Table S9: Cartesian coordinates of KIVDIC

| <b>Atom Label</b> | <b>x</b>  | <b>y</b> | <b>z</b>  |
|-------------------|-----------|----------|-----------|
| N                 | -3.101600 | 6.940900 | 9.181000  |
| C                 | -2.885000 | 6.414700 | 10.520100 |
| C                 | -1.426400 | 6.537700 | 10.986600 |
| C                 | -0.485500 | 5.907600 | 9.968200  |
| C                 | -1.231300 | 5.853400 | 12.324400 |
| C                 | -3.851900 | 7.113700 | 11.504100 |
| O                 | -3.416700 | 7.941800 | 12.279000 |
| N                 | -5.140200 | 6.808500 | 11.467000 |
| C                 | -5.828400 | 6.050900 | 10.405900 |
| C                 | -7.181000 | 5.715600 | 11.085700 |
| C                 | -7.421800 | 6.907000 | 12.009200 |
| C                 | -6.053500 | 7.335300 | 12.475800 |
| C                 | -6.118800 | 6.921700 | 9.192000  |
| O                 | -6.141900 | 8.134300 | 9.253900  |

Continued on next page

Table S9 – continued from previous page

| <b>Atom Label</b> | <b>x</b>  | <b>y</b> | <b>z</b>  |
|-------------------|-----------|----------|-----------|
| N                 | -6.439100 | 6.245300 | 8.077200  |
| C                 | -7.028200 | 6.971000 | 6.970700  |
| C                 | -8.487800 | 7.350000 | 7.274900  |
| C                 | -3.159000 | 6.180800 | 8.077200  |
| O                 | -3.181400 | 4.955000 | 8.096500  |
| H                 | -3.157800 | 7.943300 | 9.080500  |
| H                 | -3.165600 | 5.370400 | 10.459800 |
| H                 | -1.178700 | 7.588000 | 11.079400 |
| H                 | -0.530200 | 6.560300 | 9.105200  |
| H                 | 0.527100  | 6.233000 | 10.172200 |
| H                 | -0.610800 | 4.835600 | 9.878300  |
| H                 | -1.852200 | 6.263300 | 13.111400 |
| H                 | -1.631200 | 4.850800 | 12.237200 |
| H                 | -0.178900 | 6.030800 | 12.508300 |
| H                 | -5.266500 | 5.190800 | 10.063200 |
| H                 | -7.062800 | 4.939600 | 11.831900 |
| H                 | -7.883400 | 5.470200 | 10.298800 |
| H                 | -7.863400 | 7.675300 | 11.386700 |
| H                 | -8.102600 | 6.610400 | 12.797500 |
| H                 | -5.808500 | 6.943300 | 13.455100 |
| H                 | -5.976900 | 8.412700 | 12.554600 |
| H                 | -6.395100 | 5.250600 | 7.914000  |
| H                 | -6.522900 | 7.863300 | 6.622500  |
| H                 | -8.865400 | 7.785100 | 6.357800  |
| H                 | -8.484800 | 7.877400 | 8.220800  |
| H                 | -8.998400 | 6.438200 | 7.559100  |
| C                 | -6.976500 | 6.180800 | 5.685300  |
| C                 | -3.107300 | 6.971000 | 6.791800  |
| N                 | -7.033900 | 6.940900 | 4.581600  |
| O                 | -6.954100 | 4.955000 | 5.666000  |
| N                 | -3.696400 | 6.245300 | 5.685300  |
| C                 | -1.647700 | 7.350000 | 6.487700  |
| H                 | -3.612600 | 7.863300 | 7.140100  |
| C                 | -7.250500 | 6.414700 | 3.242500  |
| H                 | -6.977700 | 7.943300 | 4.682000  |
| C                 | -4.016700 | 6.921700 | 4.570500  |
| H                 | -3.740400 | 5.250600 | 5.848600  |
| H                 | -1.270100 | 7.785100 | 7.404800  |

Continued on next page

Table S9 – continued from previous page

| <b>Atom Label</b> | <b>x</b>   | <b>y</b> | <b>z</b> |
|-------------------|------------|----------|----------|
| H                 | -1.650700  | 7.877400 | 5.541800 |
| H                 | -1.137100  | 6.438200 | 6.203500 |
| C                 | -8.709100  | 6.537700 | 2.775900 |
| C                 | -6.283600  | 7.113700 | 2.258400 |
| H                 | -6.969900  | 5.370400 | 3.302800 |
| C                 | -4.307100  | 6.050900 | 3.356700 |
| O                 | -3.993600  | 8.134300 | 4.508600 |
| C                 | -9.650000  | 5.907600 | 3.794300 |
| C                 | -8.904200  | 5.853400 | 1.438200 |
| H                 | -8.956800  | 7.588000 | 2.683100 |
| O                 | -6.718800  | 7.941800 | 1.483600 |
| N                 | -4.995300  | 6.808500 | 2.295600 |
| C                 | -2.954600  | 5.715600 | 2.676800 |
| H                 | -4.869000  | 5.190800 | 3.699300 |
| H                 | -9.605300  | 6.560300 | 4.657400 |
| H                 | -10.662700 | 6.233000 | 3.590300 |
| H                 | -9.524700  | 4.835600 | 3.884200 |
| H                 | -8.283300  | 6.263300 | 0.651200 |
| H                 | -8.504300  | 4.850800 | 1.525400 |
| H                 | -9.956600  | 6.030800 | 1.254300 |
| C                 | -4.082000  | 7.335300 | 1.286800 |
| C                 | -2.713700  | 6.907000 | 1.753300 |
| H                 | -3.072800  | 4.939600 | 1.930600 |
| H                 | -2.252100  | 5.470200 | 3.463700 |
| H                 | -4.327000  | 6.943300 | 0.307400 |
| H                 | -4.158700  | 8.412700 | 1.207900 |
| H                 | -2.272100  | 7.675300 | 2.375800 |
| H                 | -2.032900  | 6.610400 | 0.965100 |

Table S10: Cartesian coordinates of NIYBIG

| <b>Atom Label</b> | <b>x</b> | <b>y</b> | <b>z</b> |
|-------------------|----------|----------|----------|
| O                 | 5.588100 | 7.609400 | 5.420800 |
| O                 | 3.299000 | 6.769800 | 3.949900 |
| O                 | 1.120800 | 5.846300 | 5.574600 |
| O                 | 0.711500 | 7.534500 | 7.861300 |
| O                 | 4.319400 | 7.776400 | 7.308100 |
| O                 | 3.616800 | 7.026500 | 9.899700 |
| O                 | 4.976600 | 9.804500 | 3.584600 |

Continued on next page

Table S10 – continued from previous page

| <b>Atom Label</b> | <b>x</b> | <b>y</b>  | <b>z</b>  |
|-------------------|----------|-----------|-----------|
| O                 | 4.985600 | 8.928800  | 1.521200  |
| O                 | 4.332900 | 4.776300  | 3.750600  |
| O                 | 0.161500 | 7.123300  | 3.970300  |
| O                 | 0.506900 | 5.829000  | 9.328500  |
| O                 | 4.171200 | 8.071200  | 11.785400 |
| C                 | 4.295500 | 7.825400  | 5.882100  |
| H                 | 3.928500 | 8.786600  | 5.544100  |
| C                 | 3.386800 | 6.705200  | 5.389300  |
| H                 | 3.761900 | 5.740000  | 5.706300  |
| C                 | 1.984400 | 6.946200  | 5.934900  |
| H                 | 1.589700 | 7.861500  | 5.511400  |
| C                 | 2.011500 | 7.066400  | 7.451300  |
| H                 | 2.239500 | 6.112100  | 7.909800  |
| C                 | 3.043300 | 8.126000  | 7.857000  |
| H                 | 2.739800 | 9.077000  | 7.437100  |
| C                 | 3.220300 | 8.300100  | 9.345100  |
| H                 | 3.980500 | 9.045600  | 9.543000  |
| H                 | 2.292000 | 8.630000  | 9.794900  |
| C                 | 6.358100 | 8.820600  | 5.265900  |
| H                 | 7.384600 | 8.636900  | 5.558100  |
| H                 | 5.956900 | 9.591300  | 5.912500  |
| C                 | 6.315300 | 9.287900  | 3.832800  |
| H                 | 7.051300 | 10.065600 | 3.670300  |
| H                 | 6.530600 | 8.465000  | 3.162500  |
| C                 | 4.397900 | 9.491600  | 2.405500  |
| C                 | 2.959800 | 9.910300  | 2.362100  |
| C                 | 2.380600 | 10.647200 | 3.525200  |
| H                 | 1.324800 | 10.822100 | 3.359700  |
| H                 | 2.890900 | 11.596300 | 3.633200  |
| H                 | 2.512200 | 10.062900 | 4.427500  |
| C                 | 2.255700 | 9.582200  | 1.279900  |
| H                 | 2.778000 | 9.003400  | 0.528200  |
| H                 | 1.215100 | 9.863200  | 1.174700  |
| C                 | 3.797000 | 5.727400  | 3.242900  |
| C                 | 3.587900 | 5.923300  | 1.771600  |
| H                 | 4.383600 | 6.535500  | 1.365400  |
| H                 | 2.635900 | 6.411300  | 1.602700  |
| H                 | 3.587900 | 4.959000  | 1.278700  |

Continued on next page

Table S10 – continued from previous page

| <b>Atom Label</b> | <b>x</b>  | <b>y</b> | <b>z</b>  |
|-------------------|-----------|----------|-----------|
| C                 | 0.241900  | 6.070400 | 4.551200  |
| C                 | -0.582300 | 4.855800 | 4.250500  |
| H                 | -1.633700 | 5.113000 | 4.285600  |
| H                 | -0.372600 | 4.090700 | 4.987700  |
| H                 | -0.336100 | 4.483400 | 3.263700  |
| C                 | 0.065300  | 6.831100 | 8.835400  |
| C                 | -1.230800 | 7.497800 | 9.181100  |
| H                 | -1.751900 | 6.910600 | 9.927100  |
| H                 | -1.844200 | 7.579600 | 8.292200  |
| H                 | -1.032200 | 8.487100 | 9.574300  |
| C                 | 4.071600  | 7.049500 | 11.158300 |
| C                 | 4.446400  | 5.677500 | 11.634700 |
| H                 | 4.229300  | 5.590300 | 12.692200 |
| H                 | 5.504000  | 5.514300 | 11.468400 |
| H                 | 3.876700  | 4.937600 | 11.086300 |

Table S11: Cartesian coordinates of QAZJAC

| <b>Atom Label</b> | <b>x</b>  | <b>y</b> | <b>z</b>  |
|-------------------|-----------|----------|-----------|
| O                 | -2.129700 | 8.873400 | 2.605700  |
| O                 | 1.193200  | 9.486900 | -0.405800 |
| O                 | 0.617600  | 5.427300 | 1.532700  |
| O                 | 3.446900  | 7.467200 | 1.619300  |
| O                 | 2.575200  | 5.397400 | -3.270900 |
| O                 | 3.671300  | 7.307200 | -3.814300 |
| O                 | 6.401900  | 6.846300 | 2.803400  |
| O                 | 6.512000  | 6.972200 | 0.571900  |
| N                 | -0.405100 | 9.206300 | 1.170000  |
| N                 | 0.939900  | 7.442700 | 0.538000  |
| N                 | -0.752500 | 7.144000 | 2.103200  |
| N                 | 4.002400  | 5.548900 | 0.595100  |
| C                 | -1.175600 | 8.443400 | 2.004800  |
| C                 | 0.611800  | 8.766700 | 0.383400  |
| C                 | 0.286900  | 6.584900 | 1.414600  |
| C                 | 2.068100  | 6.880400 | -0.210900 |
| C                 | 3.229200  | 6.644700 | 0.735400  |
| C                 | 3.855300  | 4.522600 | -0.427800 |
| C                 | 4.764200  | 4.712500 | -1.624100 |
| N                 | 4.552800  | 5.954400 | -2.333300 |

Continued on next page

Table S11 – continued from previous page

| <b>Atom Label</b> | <b>x</b>  | <b>y</b>  | <b>z</b>  |
|-------------------|-----------|-----------|-----------|
| C                 | 3.524300  | 6.151700  | -3.155300 |
| C                 | 2.666600  | 7.826800  | -4.743100 |
| C                 | 1.442200  | 8.165000  | -3.940000 |
| C                 | 2.426200  | 6.871900  | -5.856100 |
| C                 | 3.312600  | 9.106000  | -5.261600 |
| C                 | 5.042200  | 5.385700  | 1.609600  |
| C                 | 6.061900  | 6.483600  | 1.568100  |
| C                 | 7.333200  | 7.975100  | 2.931200  |
| C                 | 7.235500  | 8.477600  | 4.275600  |
| H                 | 4.109800  | 3.573200  | 0.026900  |
| H                 | 2.815300  | 4.547900  | -0.728600 |
| H                 | 4.581000  | 5.378900  | 2.589500  |
| H                 | 5.523800  | 4.439700  | 1.395100  |
| H                 | 4.623800  | 3.864600  | -2.283000 |
| H                 | 2.353000  | 7.614400  | -0.954500 |
| H                 | 1.682300  | 5.980200  | -0.673000 |
| H                 | 5.793000  | 4.749000  | -1.287700 |
| H                 | -1.326100 | 6.574900  | 2.707500  |
| H                 | -0.712300 | 10.152000 | 0.998800  |
| H                 | 2.670800  | 9.586000  | -5.990000 |
| H                 | 0.991900  | 7.262400  | -3.545800 |
| H                 | 1.915800  | 5.990000  | -5.489200 |
| H                 | 0.771100  | 8.550100  | -4.697700 |
| H                 | 1.874600  | 7.291000  | -6.688500 |
| H                 | 3.372400  | 9.720600  | -4.371900 |
| H                 | 4.252600  | 8.896200  | -5.756900 |
| H                 | 7.918600  | 9.306100  | 4.416900  |
| H                 | 6.199600  | 8.770600  | 4.393400  |
| H                 | 3.417200  | 6.550000  | -6.151600 |
| H                 | 1.562200  | 8.753500  | -3.038800 |
| H                 | 5.315000  | 6.614400  | -2.370200 |
| H                 | 7.600300  | 7.497400  | 4.556700  |
| H                 | 8.249200  | 7.523700  | 2.570500  |
| H                 | 7.132500  | 8.816900  | 2.280000  |



Table S12: Cartesian coordinates of QEDSAT

| Atom Label | x         | y         | z         |
|------------|-----------|-----------|-----------|
| F          | -5.876100 | -0.492000 | 3.502900  |
| F          | -6.959700 | -0.874900 | 1.708700  |
| F          | -5.444200 | -2.228400 | 2.342700  |
| O          | 2.594400  | 0.160900  | -6.096400 |
| O          | 1.995100  | -0.873500 | -7.975000 |
| O          | -0.477600 | 0.970600  | -6.782000 |
| O          | -2.903600 | -0.993200 | -5.242100 |
| O          | -0.402800 | -1.642100 | -2.319300 |
| O          | -1.794500 | 1.309700  | -0.724300 |
| O          | -4.708900 | -0.470700 | 0.235600  |
| N          | -3.969000 | 0.682100  | 2.038000  |
| N          | -1.725100 | -0.373600 | 0.758200  |
| N          | -2.555800 | -1.382800 | -1.672400 |
| N          | -2.107300 | 0.416200  | -3.681100 |
| N          | 0.076200  | -0.425500 | -5.108500 |
| C          | 3.770300  | 0.698000  | -6.751500 |
| C          | 4.883700  | -0.267200 | -6.749200 |
| C          | 1.836400  | -0.650200 | -6.811300 |
| C          | 0.811700  | -1.384100 | -5.947600 |
| C          | -0.128900 | -2.179200 | -6.830100 |
| C          | 1.572100  | -2.306900 | -4.987800 |
| C          | -0.622400 | 0.599600  | -5.625300 |
| C          | -1.527700 | 1.361500  | -4.639700 |
| C          | -2.609500 | 2.115400  | -5.398000 |
| C          | -0.665700 | 2.325500  | -3.835800 |
| C          | -2.712400 | -0.715300 | -4.072500 |
| C          | -3.178300 | -1.692600 | -2.956800 |
| C          | -4.696300 | -1.510400 | -2.830200 |
| C          | -5.236800 | -0.106400 | -2.759900 |
| C          | -6.728200 | -0.062500 | -2.430600 |
| C          | -7.296600 | 1.323000  | -2.328600 |
| C          | -2.830200 | -3.129900 | -3.403300 |
| C          | -3.229500 | -4.186900 | -2.393100 |
| C          | -1.230400 | -1.408000 | -1.419200 |
| C          | -0.765000 | -1.196600 | -0.003500 |
| C          | 0.624000  | -0.563800 | 0.043400  |
| C          | -0.736300 | -2.571400 | 0.687900  |

Continued on next page

Table S12 – continued from previous page

| <b>Atom Label</b> | <b>x</b>  | <b>y</b>  | <b>z</b>  |
|-------------------|-----------|-----------|-----------|
| C                 | -2.141600 | 0.817700  | 0.336300  |
| C                 | -3.076900 | 1.598200  | 1.286800  |
| C                 | -3.911900 | 2.578100  | 0.487500  |
| C                 | -2.219400 | 2.330800  | 2.304000  |
| C                 | -4.744100 | -0.188800 | 1.418000  |
| C                 | -5.771800 | -0.946700 | 2.272400  |
| H                 | -3.990400 | 0.731300  | 2.871300  |
| H                 | -1.783500 | -0.545100 | 1.500100  |
| H                 | -3.055800 | -1.116900 | -1.089900 |
| H                 | -2.047800 | 0.571700  | -2.953300 |
| H                 | -0.107800 | -0.664800 | -4.219000 |
| H                 | 4.044200  | 1.493100  | -6.295700 |
| H                 | 3.551000  | 0.921400  | -7.650400 |
| H                 | 4.603800  | -1.066300 | -7.165200 |
| H                 | 5.619800  | 0.105000  | -7.227300 |
| H                 | 5.145300  | -0.438800 | -5.853800 |
| H                 | 0.371200  | -2.796100 | -7.342200 |
| H                 | -0.590000 | -1.580900 | -7.414900 |
| H                 | -0.755200 | -2.635300 | -6.288600 |
| H                 | 2.071400  | -2.933100 | -5.488200 |
| H                 | 2.162800  | -1.781700 | -4.453400 |
| H                 | 0.952900  | -2.752300 | -4.427600 |
| H                 | -2.204600 | 2.732300  | -6.003800 |
| H                 | -3.146400 | 1.505100  | -5.879600 |
| H                 | -3.151700 | 2.602000  | -4.782700 |
| H                 | -0.284300 | 2.978300  | -4.418200 |
| H                 | 0.026800  | 1.850800  | -3.399800 |
| H                 | -1.203000 | 2.772200  | -3.185300 |
| H                 | -5.094700 | -1.919900 | -3.585000 |
| H                 | -4.970000 | -1.950500 | -2.039200 |
| H                 | -4.763000 | 0.374900  | -2.086100 |
| H                 | -5.098600 | 0.323100  | -3.599000 |
| H                 | -7.197400 | -0.519900 | -3.113800 |
| H                 | -6.862500 | -0.493300 | -1.598500 |
| H                 | -6.842300 | 1.810900  | -1.646600 |
| H                 | -7.188000 | 1.780300  | -3.158400 |
| H                 | -8.221100 | 1.277700  | -2.116500 |
| H                 | -1.892300 | -3.176400 | -3.541600 |

Continued on next page

Table S12 – continued from previous page

| <b>Atom Label</b> | <b>x</b>  | <b>y</b>  | <b>z</b>  |
|-------------------|-----------|-----------|-----------|
| H                 | -3.280600 | -3.301400 | -4.221300 |
| H                 | -2.981700 | -5.036500 | -2.717700 |
| H                 | -4.169800 | -4.149700 | -2.258300 |
| H                 | -2.786100 | -4.011400 | -1.569200 |
| H                 | 0.593000  | 0.305800  | -0.355100 |
| H                 | 1.236500  | -1.103600 | -0.432400 |
| H                 | 0.904900  | -0.477300 | 0.948100  |
| H                 | -0.121800 | -3.131200 | 0.237900  |
| H                 | -0.464100 | -2.457100 | 1.592700  |
| H                 | -1.602900 | -2.949100 | 0.661000  |
| H                 | -3.338300 | 3.173800  | 0.010500  |
| H                 | -4.458200 | 2.108700  | -0.125400 |
| H                 | -4.461800 | 3.087300  | 1.078200  |
| H                 | -1.637500 | 2.939700  | 1.854000  |
| H                 | -1.705800 | 1.709900  | 2.796200  |
| H                 | -2.779000 | 2.825400  | 2.898200  |

Table S13: Cartesian coordinates of QEVKOR

| <b>Atom Label</b> | <b>x</b>  | <b>y</b>  | <b>z</b>  |
|-------------------|-----------|-----------|-----------|
| F                 | 2.178300  | 0.761600  | 5.333400  |
| F                 | 2.751300  | -1.139600 | 4.445400  |
| O                 | 2.103300  | 2.179100  | 1.066000  |
| O                 | 3.950800  | 2.722900  | -0.020100 |
| O                 | 4.235300  | 0.121400  | 2.621700  |
| C                 | 3.293000  | 2.564900  | 1.024700  |
| C                 | 4.015600  | 2.863800  | 2.330200  |
| N                 | 3.532000  | 2.097500  | 3.460900  |
| C                 | 3.699500  | 0.791300  | 3.488500  |
| C                 | 3.200600  | 0.088200  | 4.765400  |
| N                 | 1.797400  | 1.138900  | -1.494200 |
| C                 | 2.968600  | 0.314700  | -1.876700 |
| C                 | 3.387100  | -0.597800 | -0.783100 |
| O                 | 2.338500  | -1.502400 | -0.512900 |
| C                 | 2.742400  | -2.453000 | 0.467300  |
| C                 | 1.586700  | -3.295700 | 0.820200  |
| O                 | 0.656600  | -2.538600 | 1.578900  |
| C                 | -0.548000 | -3.212700 | 1.886200  |
| C                 | 1.504700  | 2.238400  | -2.454200 |

Continued on next page

Table S13 – continued from previous page

| <b>Atom Label</b> | <b>x</b>  | <b>y</b>  | <b>z</b>  |
|-------------------|-----------|-----------|-----------|
| O                 | 0.538300  | 0.255400  | 2.253900  |
| H                 | 3.849500  | 3.913600  | 2.538100  |
| H                 | 5.066900  | 2.637400  | 2.202100  |
| H                 | 3.057000  | 2.591000  | 4.201800  |
| H                 | 1.962300  | 1.564000  | -0.594000 |
| H                 | 0.993200  | 0.533600  | -1.423700 |
| H                 | 2.632100  | -0.228000 | -2.751400 |
| H                 | 3.756200  | 1.020700  | -2.109600 |
| H                 | 3.590200  | -0.042000 | 0.124000  |
| H                 | 4.309800  | -1.083700 | -1.075300 |
| H                 | 3.031200  | -1.929300 | 1.370200  |
| H                 | 3.582300  | -3.041900 | 0.119900  |
| H                 | 1.031300  | -3.694900 | -0.019500 |
| H                 | 1.915400  | -4.174800 | 1.360600  |
| H                 | -0.904300 | -3.663100 | 0.968000  |
| H                 | -0.399000 | -4.042800 | 2.565800  |
| H                 | 0.928600  | 1.794600  | -3.256800 |
| H                 | 2.449300  | 2.730200  | -2.651000 |
| H                 | 1.037900  | 1.007800  | 1.866000  |
| H                 | 0.999000  | -0.583600 | 2.030000  |
| C                 | 4.296500  | -0.088200 | 5.831400  |
| F                 | 5.318800  | -0.761600 | 5.263400  |
| F                 | 4.745900  | 1.139600  | 6.151500  |
| C                 | 3.797700  | -0.791300 | 7.108400  |
| O                 | 3.261800  | -0.121400 | 7.975200  |
| N                 | 3.965100  | -2.097500 | 7.135900  |
| C                 | 3.481600  | -2.863800 | 8.266600  |
| C                 | 4.204100  | -2.564900 | 9.572100  |
| O                 | 5.393800  | -2.179100 | 9.530800  |
| O                 | 3.546300  | -2.722900 | 10.617000 |
| H                 | 3.647600  | -3.913600 | 8.058700  |
| H                 | 2.430300  | -2.637400 | 8.394700  |
| H                 | 4.440200  | -2.591000 | 6.395000  |
| C                 | -1.504700 | -2.238400 | 2.454200  |
| N                 | -1.797400 | -1.138900 | 1.494200  |
| C                 | -2.968600 | -0.314700 | 1.876700  |
| C                 | -3.387100 | 0.597800  | 0.783100  |
| O                 | -2.338500 | 1.502400  | 0.512900  |

Continued on next page

Table S13 – continued from previous page

| <b>Atom Label</b> | <b>x</b>  | <b>y</b>  | <b>z</b>  |
|-------------------|-----------|-----------|-----------|
| C                 | -2.742400 | 2.453000  | -0.467300 |
| C                 | -1.586700 | 3.295700  | -0.820200 |
| O                 | -0.656600 | 2.538600  | -1.578900 |
| C                 | 0.548000  | 3.212700  | -1.886200 |
| H                 | 0.904300  | 3.663100  | -0.968000 |
| H                 | 0.399000  | 4.042800  | -2.565800 |
| H                 | -1.031300 | 3.694900  | 0.019500  |
| H                 | -1.915400 | 4.174800  | -1.360600 |
| H                 | -3.031200 | 1.929300  | -1.370200 |
| H                 | -3.582300 | 3.041900  | -0.119900 |
| H                 | -3.590200 | 0.042000  | -0.124000 |
| H                 | -4.309800 | 1.083700  | 1.075300  |
| H                 | -2.632100 | 0.228000  | 2.751400  |
| H                 | -3.756200 | -1.020700 | 2.109600  |
| H                 | -1.962300 | -1.564000 | 0.594000  |
| H                 | -0.993200 | -0.533600 | 1.423700  |
| H                 | -0.928600 | -1.794600 | 3.256800  |
| H                 | -2.449300 | -2.730200 | 2.651000  |

Table S14: Cartesian coordinates of ZEVHIR

| <b>Atom Label</b> | <b>x</b>  | <b>y</b>   | <b>z</b>  |
|-------------------|-----------|------------|-----------|
| O                 | -1.731600 | -8.680900  | -0.495000 |
| O                 | -3.666000 | -10.409600 | -2.830400 |
| O                 | -5.705300 | -11.946000 | -0.014700 |
| O                 | -2.885000 | -14.334300 | 0.291700  |
| O                 | -4.459500 | -16.297800 | -2.286900 |
| O                 | -7.402100 | -17.533100 | -1.812500 |
| O                 | -7.248200 | -15.663400 | -3.021900 |
| N                 | -2.494200 | -7.163800  | -1.988600 |
| N                 | -4.663200 | -8.854300  | -1.529000 |
| N                 | -3.732900 | -10.844200 | 0.125900  |
| N                 | -3.288300 | -13.018000 | -1.487700 |
| N                 | -5.530200 | -14.631100 | -1.217400 |
| C                 | -1.429900 | -6.377100  | 0.026500  |
| C                 | -1.899400 | -7.509800  | -0.827100 |
| C                 | -2.845900 | -8.153100  | -3.016700 |
| C                 | -3.681600 | -7.420400  | -4.089100 |
| C                 | -1.593800 | -8.813200  | -3.628800 |

Continued on next page

Table S14 – continued from previous page

| <b>Atom Label</b> | <b>x</b>  | <b>y</b>   | <b>z</b>  |
|-------------------|-----------|------------|-----------|
| C                 | -0.566700 | -7.829200  | -4.170800 |
| C                 | -3.751400 | -9.247700  | -2.448900 |
| C                 | -5.669300 | -9.750700  | -0.957500 |
| C                 | -6.632200 | -10.261900 | -2.038700 |
| C                 | -6.446600 | -8.940200  | 0.092100  |
| C                 | -5.023300 | -10.948200 | -0.237900 |
| C                 | -2.985300 | -11.969700 | 0.724700  |
| C                 | -1.513600 | -11.547000 | 0.799800  |
| C                 | -3.524900 | -12.291800 | 2.136600  |
| C                 | -3.060200 | -13.224100 | -0.171600 |
| C                 | -3.466100 | -14.120200 | -2.437800 |
| C                 | -4.040600 | -13.524700 | -3.743700 |
| C                 | -2.145900 | -14.831800 | -2.720700 |
| C                 | -4.510100 | -15.121600 | -1.939200 |
| C                 | -6.611200 | -15.502000 | -0.747600 |
| C                 | -6.120900 | -16.401900 | 0.387400  |
| C                 | -7.760500 | -14.592700 | -0.290200 |
| C                 | -7.104300 | -16.373900 | -1.906800 |
| C                 | -7.635400 | -16.388300 | -4.213600 |
| H                 | -2.634700 | -6.183200  | -2.180400 |
| H                 | -4.663700 | -7.885600  | -1.246400 |
| H                 | -3.259300 | -9.966700  | -0.028900 |
| H                 | -3.356300 | -12.073700 | -1.836700 |
| H                 | -5.544000 | -13.640300 | -1.027200 |
| H                 | -1.722800 | -6.533600  | 1.057300  |
| H                 | -0.351300 | -6.349100  | -0.066100 |
| H                 | -1.725800 | -5.366400  | -0.226000 |
| H                 | -3.938400 | -8.127500  | -4.868200 |
| H                 | -4.577600 | -7.041200  | -3.613500 |
| H                 | -3.093400 | -6.620700  | -4.521800 |
| H                 | -1.933100 | -9.433600  | -4.449000 |
| H                 | -1.127300 | -9.443100  | -2.881500 |
| H                 | 0.262800  | -8.366100  | -4.614400 |
| H                 | -0.999200 | -7.220800  | -4.955400 |
| H                 | -0.195800 | -7.183600  | -3.384300 |
| H                 | -7.362600 | -10.924400 | -1.590800 |
| H                 | -7.168700 | -9.460200  | -2.531000 |
| H                 | -6.110000 | -10.844000 | -2.787800 |

Continued on next page

Table S14 – continued from previous page

| <b>Atom Label</b> | <b>x</b>  | <b>y</b>   | <b>z</b>  |
|-------------------|-----------|------------|-----------|
| H                 | -7.230400 | -9.546400  | 0.529200  |
| H                 | -5.761400 | -8.537700  | 0.827900  |
| H                 | -6.900600 | -8.102900  | -0.423300 |
| H                 | -0.914400 | -12.335300 | 1.238400  |
| H                 | -1.131100 | -11.361800 | -0.196300 |
| H                 | -1.394100 | -10.653100 | 1.399600  |
| H                 | -2.920300 | -13.084200 | 2.560300  |
| H                 | -3.441700 | -11.393400 | 2.735700  |
| H                 | -4.557600 | -12.602400 | 2.037400  |
| H                 | -4.284300 | -14.284900 | -4.475400 |
| H                 | -4.881700 | -12.861200 | -3.584700 |
| H                 | -3.136700 | -12.990300 | -4.008800 |
| H                 | -1.454000 | -14.152000 | -3.202500 |
| H                 | -1.707000 | -15.280600 | -1.838200 |
| H                 | -2.355500 | -15.594000 | -3.460900 |
| H                 | -6.951600 | -16.984400 | 0.766300  |
| H                 | -5.319700 | -17.049600 | 0.053600  |
| H                 | -5.744600 | -15.865000 | 1.249400  |
| H                 | -8.556600 | -15.221000 | 0.089700  |
| H                 | -7.450400 | -13.981300 | 0.548300  |
| H                 | -8.166100 | -14.004300 | -1.104000 |
| H                 | -7.792600 | -15.694400 | -5.030100 |
| H                 | -6.910400 | -17.168100 | -4.411200 |
| H                 | -8.580700 | -16.852200 | -3.960100 |

Table S15: Cartesian coordinates of glycine

| <b>Atom Label</b> | <b>x</b>   | <b>y</b>  | <b>z</b>  |
|-------------------|------------|-----------|-----------|
| C                 | -13.131500 | -0.172000 | 2.176700  |
| C                 | -11.949800 | -0.472100 | 1.288400  |
| O                 | -10.813700 | -0.445200 | 1.684600  |
| H                 | -12.805200 | 0.439900  | 3.004700  |
| H                 | -13.519700 | -1.105700 | 2.571900  |
| H                 | -13.929300 | 0.328600  | 1.640800  |
| N                 | -12.233300 | -0.775800 | -0.008500 |
| C                 | -11.228100 | -1.400500 | -0.844300 |
| C                 | -10.020700 | -0.528100 | -1.145400 |
| O                 | -8.961300  | -1.037600 | -1.408900 |
| H                 | -13.186300 | -0.932200 | -0.250200 |

Continued on next page

Table S15 – continued from previous page

| <b>Atom Label</b> | <b>x</b>   | <b>y</b>  | <b>z</b>  |
|-------------------|------------|-----------|-----------|
| H                 | -10.840300 | -2.305600 | -0.396900 |
| H                 | -11.686900 | -1.661600 | -1.789900 |
| N                 | -10.195200 | 0.804500  | -1.122800 |
| C                 | -9.094000  | 1.701700  | -1.379300 |
| C                 | -7.941500  | 1.604600  | -0.387900 |
| O                 | -6.850700  | 2.010300  | -0.709200 |
| H                 | -11.087600 | 1.169800  | -0.884600 |
| H                 | -8.667600  | 1.522600  | -2.355600 |
| H                 | -9.465100  | 2.718300  | -1.359300 |
| N                 | -8.190700  | 1.070100  | 0.817000  |
| C                 | -7.124500  | 0.891000  | 1.772200  |
| C                 | -6.005600  | -0.035500 | 1.315500  |
| O                 | -4.913700  | 0.050100  | 1.824900  |
| H                 | -9.089800  | 0.695200  | 1.030800  |
| H                 | -6.655000  | 1.833400  | 2.013500  |
| H                 | -7.547700  | 0.482900  | 2.680900  |
| N                 | -6.282700  | -0.924500 | 0.348700  |
| C                 | -5.249900  | -1.784000 | -0.173600 |
| C                 | -4.087300  | -1.055500 | -0.834100 |
| O                 | -3.019500  | -1.610600 | -0.943800 |
| H                 | -7.186900  | -0.953400 | -0.070800 |
| H                 | -4.817700  | -2.395500 | 0.605300  |
| H                 | -5.694000  | -2.441100 | -0.910100 |
| N                 | -4.299200  | 0.193900  | -1.275800 |
| C                 | -3.219100  | 0.963100  | -1.841200 |
| C                 | -2.057700  | 1.225700  | -0.891900 |
| O                 | -0.966500  | 1.488800  | -1.340200 |
| H                 | -5.181100  | 0.639300  | -1.137700 |
| H                 | -2.796300  | 0.469600  | -2.704200 |
| H                 | -3.613400  | 1.919700  | -2.159100 |
| N                 | -2.297500  | 1.154300  | 0.426400  |
| C                 | -1.225300  | 1.318500  | 1.375500  |
| C                 | -0.113900  | 0.282900  | 1.269000  |
| O                 | 0.982600   | 0.534200  | 1.711000  |
| H                 | -3.200100  | 0.898500  | 0.766200  |
| H                 | -0.749100  | 2.282100  | 1.266300  |
| H                 | -1.642600  | 1.259500  | 2.372500  |
| N                 | -0.403300  | -0.887700 | 0.680200  |

Continued on next page



Table S15 – continued from previous page

| <b>Atom Label</b> | <b>x</b>  | <b>y</b>  | <b>z</b>  |
|-------------------|-----------|-----------|-----------|
| C                 | 0.623000  | -1.878700 | 0.477500  |
| C                 | 1.773700  | -1.434700 | -0.415700 |
| O                 | 2.839700  | -1.999500 | -0.342400 |
| H                 | -1.307100 | -1.051200 | 0.290500  |
| H                 | 1.069100  | -2.178400 | 1.414700  |
| H                 | 0.167900  | -2.751100 | 0.026400  |
| N                 | 1.552200  | -0.417700 | -1.262600 |
| C                 | 2.620400  | 0.102200  | -2.078400 |
| C                 | 3.791000  | 0.691200  | -1.302200 |
| O                 | 4.870100  | 0.794000  | -1.835900 |
| H                 | 0.671800  | 0.051900  | -1.274400 |
| H                 | 3.037800  | -0.665800 | -2.713400 |
| H                 | 2.215100  | 0.880500  | -2.712100 |
| N                 | 3.570200  | 1.079800  | -0.036800 |
| C                 | 4.651300  | 1.575100  | 0.777600  |
| C                 | 5.768100  | 0.573900  | 1.042900  |
| O                 | 6.857400  | 0.970500  | 1.378600  |
| H                 | 2.676100  | 0.949000  | 0.386300  |
| H                 | 5.121600  | 2.434700  | 0.322500  |
| H                 | 4.243800  | 1.880100  | 1.732800  |
| N                 | 5.487400  | -0.730900 | 0.892800  |
| C                 | 6.519100  | -1.723900 | 1.051700  |
| C                 | 7.655000  | -1.650500 | 0.038400  |
| O                 | 8.702300  | -2.199400 | 0.283000  |
| H                 | 4.586500  | -1.024500 | 0.581100  |
| H                 | 6.981900  | -1.651600 | 2.025300  |
| H                 | 6.064400  | -2.702500 | 0.967100  |
| N                 | 7.434200  | -0.975500 | -1.100000 |
| C                 | 8.479200  | -0.808000 | -2.079300 |
| C                 | 9.650200  | 0.080800  | -1.669700 |
| O                 | 10.647000 | 0.070800  | -2.341800 |
| H                 | 6.563800  | -0.512700 | -1.251700 |
| H                 | 8.910400  | -1.762000 | -2.345800 |
| H                 | 8.041600  | -0.378500 | -2.970800 |
| N                 | 9.492200  | 0.848100  | -0.573800 |
| C                 | 10.568800 | 1.637400  | -0.032200 |
| C                 | 11.399700 | 0.983100  | 1.067700  |
| O                 | 12.264300 | 1.628700  | 1.606100  |

Continued on next page

Table S15 – continued from previous page

| <b>Atom Label</b> | <b>x</b>  | <b>y</b>  | <b>z</b>  |
|-------------------|-----------|-----------|-----------|
| H                 | 8.632700  | 0.822100  | -0.069300 |
| H                 | 11.249400 | 1.901000  | -0.827500 |
| H                 | 10.172000 | 2.554000  | 0.384100  |
| N                 | 11.121600 | -0.287200 | 1.386600  |
| C                 | 11.881600 | -0.983400 | 2.397700  |
| H                 | 10.407800 | -0.784100 | 0.902400  |
| H                 | 11.830400 | -0.463200 | 3.346400  |
| H                 | 11.464400 | -1.974500 | 2.514200  |
| H                 | 12.924600 | -1.069400 | 2.116200  |



## 2 Molecule Figures

Molecule 1  
BAVCAC

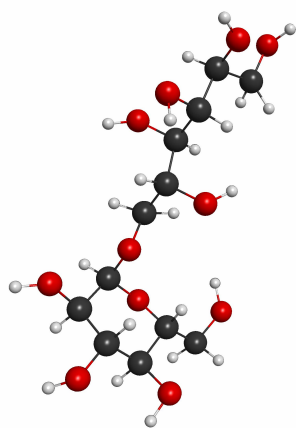

Molecule 2  
BDGPGL

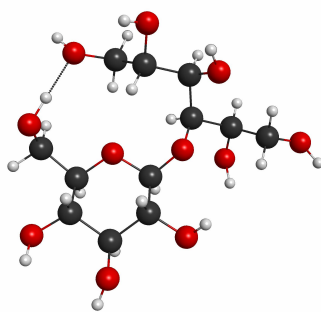

Molecule 3  
BIHYAS10

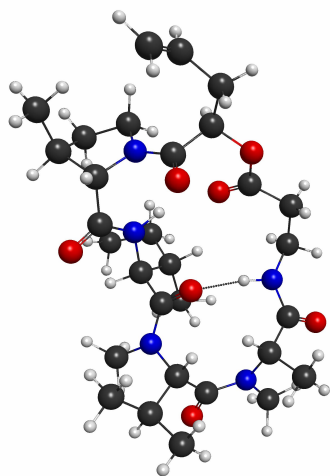

Molecule 4  
DOSLED

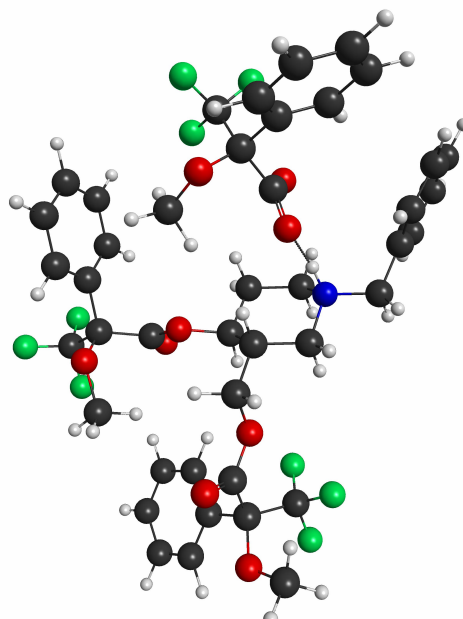

Molecule 5  
GENTBS01

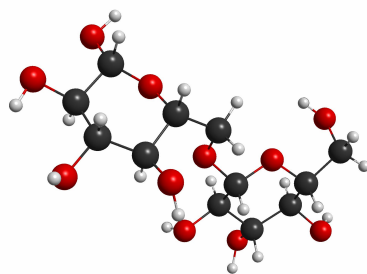



Molecule 6  
GelA

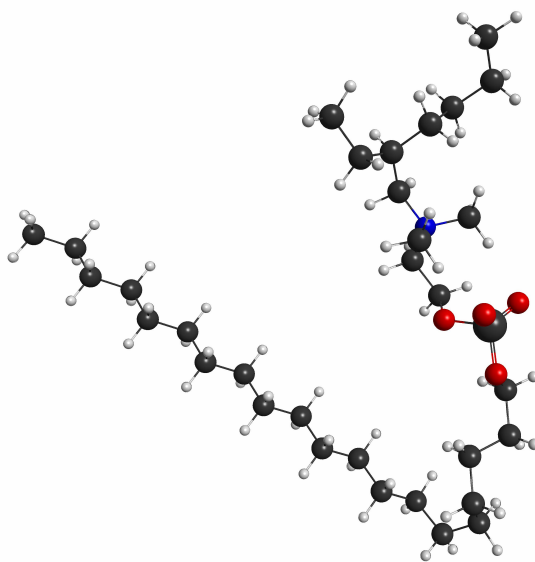

Molecule 7  
GelB

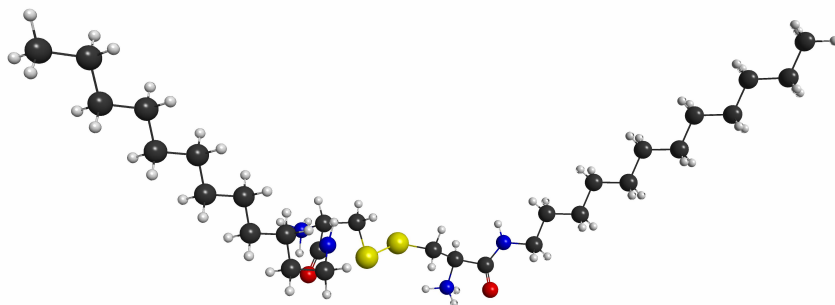

Molecule 8  
HEBLIJ

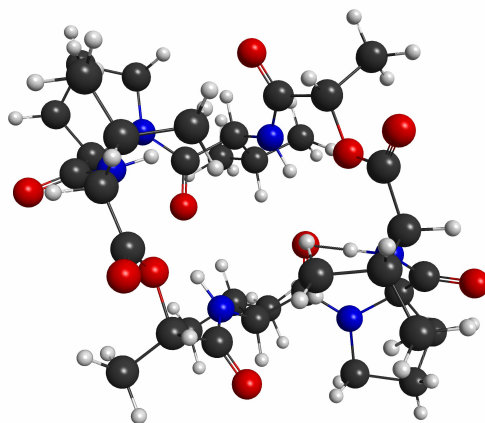

Molecule 9  
KIVDIC

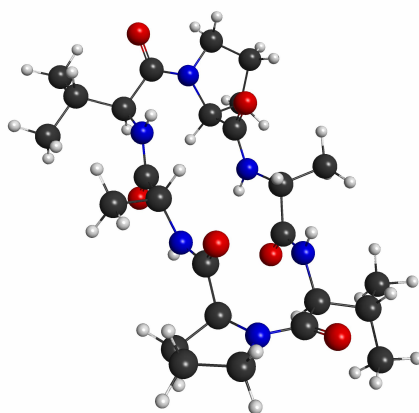

Molecule 10  
NIYBIG

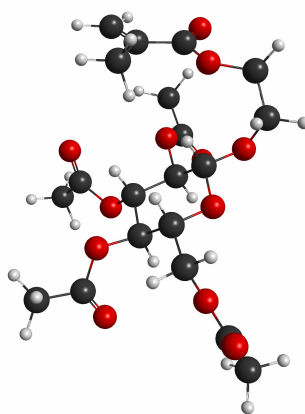

Molecule 11  
QAZJAC

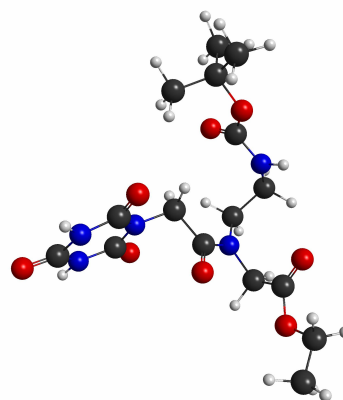

Molecule 12  
QEDSAT

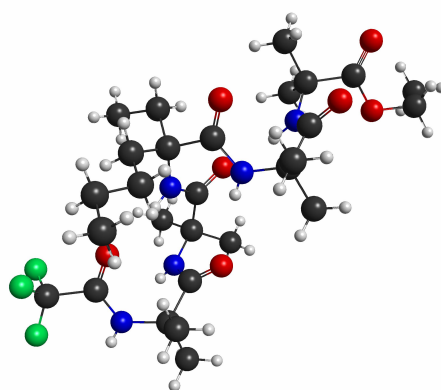

Molecule 13  
QEVKOR

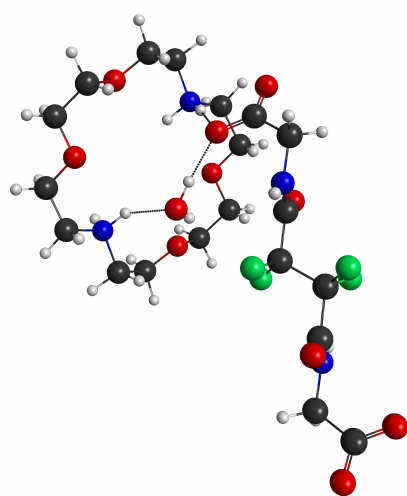



Molecule 14  
ZEVHIR

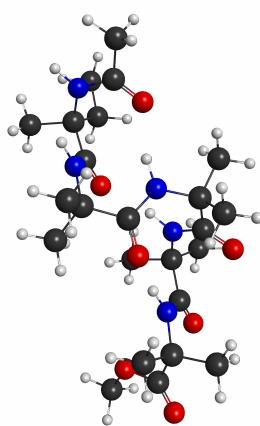

Molecule 15  
glycine

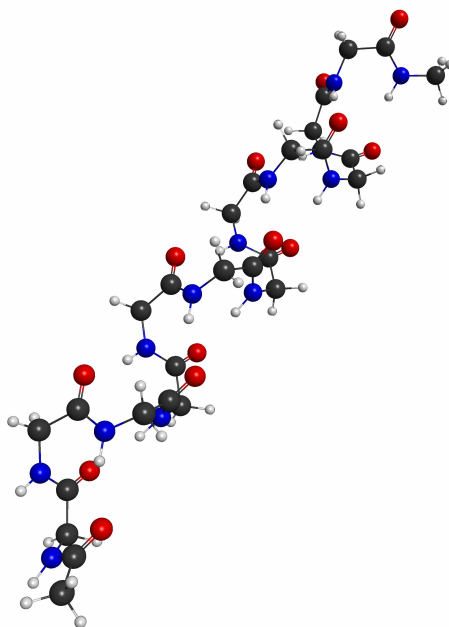

### 3 CPU Times

This section presents full molecule and Level 4 CPU Times for all molecules in the test set at HF/6-31++G(d,p). In addition, the number of basis functions in the full molecule calculation, as well as the number of fragments and the average number of atoms per fragment at Level 4, are presented as a measure of the expected cost of the calculations.

Table S16: Total CPU Times for the 15 molecules in the test set at Level 4 and for the complete molecule.

|          | <b>Total Number<br/>of Basis<br/>Functions</b> | <b>Number of<br/>Fragments at<br/>Level 4</b> | <b>Average Number<br/>of Atoms<br/>per Fragment</b> | <b>Level 4<br/>CPU<br/>Time</b> | <b>Full<br/>Molecule<br/>CPU Time</b> |
|----------|------------------------------------------------|-----------------------------------------------|-----------------------------------------------------|---------------------------------|---------------------------------------|
| GENTBS01 | 569                                            | 29                                            | 18.17                                               | 1.321                           | 1.264                                 |
| BAVCAC   | 581                                            | 25                                            | 17.56                                               | 0.959                           | 1.312                                 |
| BDGPGL   | 581                                            | 32                                            | 16.96                                               | 1.069                           | 1.631                                 |
| QAJZAC   | 701                                            | 15                                            | 16.93                                               | 1.176                           | 2.674                                 |
| NIYBIG   | 776                                            | 39                                            | 16.51                                               | 1.474                           | 4.353                                 |
| ZEVHIR   | 942                                            | 13                                            | 38.53                                               | 15.030                          | 9.284                                 |
| QEVKOR   | 957                                            | 44                                            | 23.47                                               | 7.461                           | 7.363                                 |
| KIVDIC   | 974                                            | 41                                            | 23.90                                               | 8.841                           | 9.622                                 |
| BIHYAS10 | 1092                                           | 33                                            | 32.69                                               | 17.675                          | 16.300                                |
| QEDSAT   | 1105                                           | 19                                            | 32.36                                               | 17.403                          | 14.532                                |
| GelB     | 1114                                           | 53                                            | 16.71                                               | 1.394                           | 4.511                                 |
| GelA     | 1134                                           | 41                                            | 21.02                                               | 7.851                           | 7.394                                 |
| glycine  | 1265                                           | 43                                            | 44.65                                               | 61.654                          | 9.801                                 |
| HEBLIJ   | 1336                                           | 55                                            | 39.60                                               | 58.492                          | 31.615                                |
| DOSLED   | 1430                                           | 21                                            | 27.04                                               | 13.922                          | 31.416                                |

### References

- (1) Hua, W.; Fang, T.; Li, W.; Yu, J.-G.; Li, S. *J. Phys. Chem. A* **2008**, *112*, 10864–10872.
